# Supplementary material
Source: HighWire-hosted journal article supplement (https://www.ajevonline.org/highwire/filestream/10556/field_highwire_adjunct_files/0/SupplementalData.pdf)
Supplement: SupplementalData.pdf [file SupplementalData.pdf]

**Supplemental Data for:**

Hickey CC, Kwasniewski MT and Wolf TK. 2018.

Leaf removal effects on Cabernet franc and Petit Verdot: II. Grape carotenoids, phenolics, and wine sensory analysis.

Am J Enol Vitic 69:231-246. doi: 10.5344/ajev.2018.17107.

**Supplemental Table 1** Effect of leaf removal on fruit zone leaf layer number (LLN) and cluster exposure flux availability (CEFA) collected at E-L 27, 31, and 33 in Cabernet franc from 2012 to 2014.

| 2012 / treatment <sup>a</sup> | E-L 31 |      | E-L 33              |         |
|-------------------------------|--------|------|---------------------|---------|
|                               | LLN    | CEFA | LLN                 | CEFA    |
| NO                            | 1.88   | 0.24 | 1.97 a <sup>b</sup> | 0.30 c  |
| MED                           | 1.88   | 0.3  | 1.36 b              | 0.50 b  |
| HIGH                          | 1.94   | 0.26 | 0.44 c              | 0.77 a  |
| Significance <sup>c</sup>     | ns     | ns   | <0.0001             | <0.0001 |

  

| 2013 / treatment | E-L 27           |         | E-L 33  |         |
|------------------|------------------|---------|---------|---------|
|                  | LLN              | CEFA    | LLN     | CEFA    |
| NO               | 2.03 a           | 0.29 b  | 2.29 a  | 0.18 c  |
| MED              | n/a <sup>d</sup> | n/a     | 1.82 b  | 0.37 b  |
| HIGH             | n/a              | n/a     | 0.09 c  | 0.69 a  |
| P-B              | 0.10 b           | 0.85 a  | 0.24 c  | 0.68 a  |
| Significance     | <0.0001          | <0.0001 | <0.0001 | <0.0001 |

  

| 2014 / treatment | E-L 27  |         | E-L 33  |         |
|------------------|---------|---------|---------|---------|
|                  | LLN     | CEFA    | LLN     | CEFA    |
| NO               | 2.42 a  | 0.25 b  | 2.34 a  | 0.24 c  |
| MED              | n/a     | n/a     | 1.22 b  | 0.47 b  |
| HIGH             | n/a     | n/a     | 0.03 c  | 0.73 a  |
| P-B              | 0.00 b  | 0.79    | 0.36 c  | 0.69 a  |
| Significance     | <0.0001 | <0.0001 | <0.0001 | <0.0001 |

<sup>a</sup>NO: no leaf removal; MED: post-fruit set removal of leaves to medium extent; HIGH: post-fruit set removal of leaves to high extent; P-B: pre-bloom leaf removal of six basal leaves and laterals.

<sup>b</sup>Means in same treatment group (columns) not sharing the same letter are significantly different at  $p = 0.05$  based on adjusted  $p$ -values using Student's  $t$ -test (only for E-L 27 in 2013 and 2014) or Tukey's honest significant difference.

<sup>c</sup>Significance of treatment effects ( $p > F$ ; ns: not significant at  $p = 0.05$ ).

<sup>d</sup>n/a: LLN and CEFA not measured in MED and HIGH plots, as leaves not yet removed from those treatments at E-L 27.

## Supplemental Data for:

Hickey CC, Kwasniewski MT and Wolf TK. 2018.

Leaf removal effects on Cabernet franc and Petit Verdot: II. Grape carotenoids, phenolics, and wine sensory analysis.

Am J Enol Vitic 69:231-246. doi: 10.5344/ajev.2018.17107.

---

---

**Supplemental Table 2** Effect of leaf removal on fruit zone leaf layer number (LLN) and cluster exposure flux availability (CEFA) collected at E-L 27, 31, and 33 in Petit Verdot from 2012 to 2014.

| 2012 / treatment <sup>a</sup> | E-L 31 |      | E-L 33              |         |
|-------------------------------|--------|------|---------------------|---------|
|                               | LLN    | CEFA | LLN                 | CEFA    |
| NO                            | 2.30   | 0.15 | 2.54 a <sup>b</sup> | 0.09 c  |
| MED                           | 2.41   | 0.16 | 1.40 b              | 0.41 b  |
| HIGH                          | 2.53   | 0.13 | 0.54 c              | 0.67 a  |
| Significance <sup>c</sup>     | ns     | ns   | <0.0001             | <0.0001 |

  

| 2013 / treatment | E-L 27           |         | E-L 33  |         |
|------------------|------------------|---------|---------|---------|
|                  | LLN              | CEFA    | LLN     | CEFA    |
| NO               | 2.13 a           | 0.21 b  | 2.35 a  | 0.14 c  |
| MED              | n/a <sup>d</sup> | n/a     | 1.25 b  | 0.38 b  |
| HIGH             | n/a              | n/a     | 0.07 c  | 0.65 a  |
| P-B              | 0.13 b           | 0.65 a  | 0.21 c  | 0.69 a  |
| Significance     | <0.0001          | <0.0001 | <0.0001 | <0.0001 |

  

| 2014 / treatment | E-L 27  |         | E-L 33  |         |
|------------------|---------|---------|---------|---------|
|                  | LLN     | CEFA    | LLN     | CEFA    |
| NO               | 2.36 a  | 0.22 b  | 2.43 a  | 0.15 c  |
| MED              | n/a     | n/a     | 1.16 b  | 0.45 b  |
| HIGH             | n/a     | n/a     | 0.01 c  | 0.72 a  |
| P-B              | 0.00 b  | 0.78 a  | 0.11 c  | 0.69 a  |
| Significance     | <0.0001 | <0.0001 | <0.0001 | <0.0001 |

<sup>a</sup>NO: no leaf removal; MED: post-fruit set removal of leaves to medium extent; HIGH: post-fruit set removal of leaves to high extent; P-B: pre-bloom leaf removal of six basal leaves and laterals.

<sup>b</sup>Means in same treatment group (columns) not sharing the same letter are significantly different at  $p = 0.05$  based on adjusted  $p$ -values using Student's  $t$ -test (only for E-L 27 in 2013 and 2014) or Tukey's honest significant difference.

<sup>c</sup>Significance of treatment effects ( $p > F$ ; ns: not significant at  $p = 0.05$ ).

<sup>d</sup>n/a: LLN and CEFA not measured in MED and HIGH plots, as leaves not yet removed from those treatments at E-L 27.

**Supplemental Data for:**

Hickey CC, Kwasniewski MT and Wolf TK. 2018.

Leaf removal effects on Cabernet franc and Petit Verdot: II. Grape carotenoids, phenolics, and wine sensory analysis.

Am J Enol Vitic 69:231-246. doi: 10.5344/ajev.2018.17107.

---

---

**Supplemental Table 3** Linear relationship ( $R^2$ ) between ambient air and berry temperature as a function of fruit-zone leaf removal, canopy side, and time of day in Cabernet franc and Petit Verdot in 2013 and 2014.

---

| 2013 <sup>a</sup> / treatment <sup>b</sup> | East  |       |       | West  |       |       |
|--------------------------------------------|-------|-------|-------|-------|-------|-------|
|                                            | AM    | NOON  | PM    | AM    | NOON  | PM    |
| <b>Cabernet franc</b>                      |       |       |       |       |       |       |
| NO                                         | 0.899 | 0.964 | 0.964 | 0.942 | 0.964 | 0.866 |
| MED                                        | 0.899 | 0.964 | 0.956 | 0.944 | 0.963 | 0.790 |
| HIGH                                       | 0.877 | 0.968 | 0.925 | 0.947 | 0.949 | 0.825 |
| P-B                                        | 0.876 | 0.961 | 0.926 | 0.948 | 0.951 | 0.809 |
| <b>Petit Verdot</b>                        |       |       |       |       |       |       |
| NO                                         | 0.920 | 0.965 | 0.935 | 0.915 | 0.950 | 0.806 |
| MED                                        | 0.883 | 0.964 | 0.939 | 0.940 | 0.949 | 0.791 |
| HIGH                                       | 0.882 | 0.952 | 0.927 | 0.943 | 0.916 | 0.717 |
| P-B                                        | 0.907 | 0.967 | 0.933 | 0.955 | 0.926 | 0.774 |
| <b>2014<sup>c</sup> / treatment</b>        |       |       |       |       |       |       |
| <b>Cabernet franc</b>                      |       |       |       |       |       |       |
| NO                                         | 0.852 | 0.845 | 0.783 | 0.871 | 0.782 | 0.758 |
| MED                                        | 0.833 | 0.853 | 0.792 | 0.874 | 0.787 | 0.717 |
| HIGH                                       | 0.789 | 0.852 | 0.805 | 0.877 | 0.777 | 0.752 |
| P-B                                        | 0.835 | 0.831 | 0.801 | 0.879 | 0.772 | 0.763 |
| <b>Petit Verdot</b>                        |       |       |       |       |       |       |
| NO                                         | 0.796 | 0.953 | 0.970 | 0.933 | 0.931 | 0.889 |
| MED                                        | 0.779 | 0.946 | 0.940 | 0.926 | 0.923 | 0.867 |
| HIGH                                       | 0.670 | 0.939 | 0.960 | 0.945 | 0.945 | 0.831 |
| P-B                                        | 0.722 | 0.924 | 0.968 | 0.931 | 0.952 | 0.870 |

---

<sup>a</sup>Data collected on 15 July, 29 July, 12 Aug, 26 Aug, 10 Sept, and 23 Sept in 2013; berry temperature averaged by each experimental unit and ambient temperature averaged by each time of day; AM: ~0900 to 1030 hr, NOON: 1245 to 1415 hr; and PM: 1545 to 1715 hr.

<sup>b</sup>NO: no leaf removal; MED: post-fruit set removal of leaves to medium extent; HIGH: post-fruit set removal of leaves to high extent; P-B: pre-bloom leaf removal of six basal leaves and laterals.

<sup>c</sup>Data collected on 8 July, 21 July, 5 Aug, 19 Aug, 27 Aug, 8 Sept, 23 Sept, and 7 Oct in 2014; berry and ambient temperature averaged by each experimental unit; AM: ~0900 to 1030 hr; NOON: 1245 to 1415 hr; and PM: 1545 to 1715 hr.

## Supplemental Data for:

Hickey CC, Kwasniewski MT and Wolf TK. 2018.

Leaf removal effects on Cabernet franc and Petit Verdot: II. Grape carotenoids, phenolics, and wine sensory analysis.

Am J Enol Vitic 69:231-246. doi: 10.5344/ajev.2018.17107.

**Supplemental Table 4** Effect of leaf removal treatment on the simple linear relationship ( $R^2$ ) between ambient air temperature and Cabernet franc berry temperature over all times of day, and the estimated minimum ambient air temperature (T) required for berries to reach, and amount of time spent at,  $\geq 30$  and  $35^\circ\text{C}$  on eastern and western canopy sides, in the postveraison periods of 2013 and 2014.

| EAST-2013 <sup>a</sup> |       |                                    |            |                                    |           |  |
|------------------------|-------|------------------------------------|------------|------------------------------------|-----------|--|
| Treatment <sup>b</sup> | $R^2$ | $\geq 30^\circ\text{C}$            |            | $\geq 35^\circ\text{C}$            |           |  |
|                        |       | Minimum air T ( $^\circ\text{C}$ ) | Time (hrs) | Minimum air T ( $^\circ\text{C}$ ) | Time (hr) |  |
| NO                     | 0.932 | 30.1                               | 37.4       | 36.2                               | 0.0       |  |
| MED                    | 0.911 | 29.7                               | 45.6       | 35.8                               | 0.0       |  |
| HIGH                   | 0.887 | 28.9                               | 60.7       | 34.9                               | 0.0       |  |
| P-B                    | 0.886 | 29.1                               | 56.8       | 35.2                               | 0.0       |  |

  

| WEST-2013 <sup>a</sup> |       |                                    |            |                                    |           |  |
|------------------------|-------|------------------------------------|------------|------------------------------------|-----------|--|
| Treatment              | $R^2$ | $\geq 30^\circ\text{C}$            |            | $\geq 35^\circ\text{C}$            |           |  |
|                        |       | Minimum air T ( $^\circ\text{C}$ ) | Time (hrs) | Minimum air T ( $^\circ\text{C}$ ) | Time (hr) |  |
| NO                     | 0.866 | 30.0                               | 40.8       | 35.7                               | 0.0       |  |
| MED                    | 0.821 | 29.5                               | 49.9       | 35.3                               | 0.0       |  |
| HIGH                   | 0.805 | 28.7                               | 65.4       | 34.2                               | 1.5       |  |
| P-B                    | 0.827 | 28.9                               | 61.9       | 34.4                               | 0.9       |  |

  

| EAST-2014 <sup>c</sup> |       |                                    |            |                                    |           |  |
|------------------------|-------|------------------------------------|------------|------------------------------------|-----------|--|
| Treatment              | $R^2$ | $\geq 30^\circ\text{C}$            |            | $\geq 35^\circ\text{C}$            |           |  |
|                        |       | Minimum air T ( $^\circ\text{C}$ ) | Time (hrs) | Minimum air T ( $^\circ\text{C}$ ) | Time (hr) |  |
| NO                     | 0.814 | 30.2                               | 14.5       | 35.8                               | 0.0       |  |
| MED                    | 0.798 | 29.8                               | 17.9       | 35.3                               | 0.0       |  |
| HIGH                   | 0.757 | 29.4                               | 22.5       | 34.9                               | 0.0       |  |
| P-B                    | 0.788 | 29.6                               | 20.3       | 35.2                               | 0.0       |  |

  

| WEST-2014 <sup>c</sup> |       |                                    |            |                                    |           |  |
|------------------------|-------|------------------------------------|------------|------------------------------------|-----------|--|
| Treatment              | $R^2$ | $\geq 30^\circ\text{C}$            |            | $\geq 35^\circ\text{C}$            |           |  |
|                        |       | Minimum air T ( $^\circ\text{C}$ ) | Time (hrs) | Minimum air T ( $^\circ\text{C}$ ) | Time (hr) |  |
| NO                     | 0.825 | 29.2                               | 24.8       | 33.8                               | 0.5       |  |
| MED                    | 0.811 | 28.9                               | 30.0       | 33.3                               | 0.9       |  |
| HIGH                   | 0.813 | 28.7                               | 32.7       | 33.0                               | 1.2       |  |
| P-B                    | 0.822 | 28.7                               | 32.7       | 33.1                               | 1.1       |  |

<sup>a</sup>Data collected on 15 July, 29 July, 12 Aug, 26 Aug, 10 Sept, and 23 Sept in 2013; berry temperature averaged by each experimental unit and ambient temperature averaged by each time of day.

<sup>b</sup>NO: no leaf removal; MED: post-fruit set removal of leaves to medium extent; HIGH: post-fruit set removal of leaves to high extent; P-B: pre-bloom leaf removal of six basal leaves and laterals.

<sup>c</sup>Data collected on 8 July, 21 July, 5 Aug, 19 Aug, 27 Aug, 8 Sept, 23 Sept, and 7 Oct in 2014; berry and ambient temperature averaged by each experimental unit.

**Supplemental Data for:**

Hickey CC, Kwasniewski MT and Wolf TK. 2018.

Leaf removal effects on Cabernet franc and Petit Verdot: II. Grape carotenoids, phenolics, and wine sensory analysis.

Am J Enol Vitic 69:231-246. doi: 10.5344/ajev.2018.17107.

**Supplemental Table 5** Effect of leaf removal treatment on the simple linear relationship ( $R^2$ ) between ambient air temperature and Petit Verdot berry temperature over all dates and times of day, and the estimated minimum ambient air temperature (T) required for berries to reach, and amount of time spent at,  $\geq 30$  and  $35^\circ\text{C}$  on eastern and western canopy sides, during the postveraison periods in 2013 and 2014.

| EAST-2013 <sup>a</sup> |       |                                    |            |                                    |           |
|------------------------|-------|------------------------------------|------------|------------------------------------|-----------|
| Treatment <sup>b</sup> | $R^2$ | $\geq 30^\circ\text{C}$            |            | $\geq 35^\circ\text{C}$            |           |
|                        |       | Minimum air T ( $^\circ\text{C}$ ) | Time (hrs) | Minimum air T ( $^\circ\text{C}$ ) | Time (hr) |
| NO                     | 0.933 | 30.6                               | 30.6       | 36.7                               | 0.0       |
| MED                    | 0.899 | 29.9                               | 42.9       | 36.1                               | 0.0       |
| HIGH                   | 0.875 | 29.3                               | 52.9       | 35.4                               | 0.0       |
| P-B                    | 0.908 | 29.5                               | 49.6       | 35.5                               | 0.0       |
| WEST-2013 <sup>a</sup> |       |                                    |            |                                    |           |
| Treatment              | $R^2$ | $\geq 30^\circ\text{C}$            |            | $\geq 35^\circ\text{C}$            |           |
|                        |       | Minimum air T ( $^\circ\text{C}$ ) | Time (hrs) | Minimum air T ( $^\circ\text{C}$ ) | Time (hr) |
| NO                     | 0.850 | 30.4                               | 32.8       | 36.5                               | 0.0       |
| MED                    | 0.845 | 29.5                               | 49.6       | 35.3                               | 0.0       |
| HIGH                   | 0.774 | 28.8                               | 61.7       | 34.5                               | 0.7       |
| P-B                    | 0.811 | 29.1                               | 57.5       | 34.7                               | 0.4       |
| EAST-2014 <sup>c</sup> |       |                                    |            |                                    |           |
| Treatment              | $R^2$ | $\geq 30^\circ\text{C}$            |            | $\geq 35^\circ\text{C}$            |           |
|                        |       | Minimum air T ( $^\circ\text{C}$ ) | Time (hrs) | Minimum air T ( $^\circ\text{C}$ ) | Time (hr) |
| NO                     | 0.897 | 30.6                               | 0.9        | 36.9                               | 0.0       |
| MED                    | 0.875 | 30.3                               | 1.0        | 36.6                               | 0.0       |
| HIGH                   | 0.827 | 30.2                               | 1.0        | 36.9                               | 0.0       |
| P-B                    | 0.841 | 30.1                               | 1.0        | 36.5                               | 0.0       |
| WEST-2014 <sup>c</sup> |       |                                    |            |                                    |           |
| Treatment              | $R^2$ | $\geq 30^\circ\text{C}$            |            | $\geq 35^\circ\text{C}$            |           |
|                        |       | Minimum air T ( $^\circ\text{C}$ ) | Time (hrs) | Minimum air T ( $^\circ\text{C}$ ) | Time (hr) |
| NO                     | 0.906 | 29.7                               | 1.4        | 34.5                               | 0.0       |
| MED                    | 0.897 | 29.4                               | 1.7        | 34.7                               | 0.0       |
| HIGH                   | 0.887 | 28.9                               | 3.5        | 34.0                               | 0.0       |
| P-B                    | 0.905 | 29.3                               | 2.0        | 34.6                               | 0.0       |

<sup>a</sup>Data collected on 15 July, 29 July, 12 Aug, 26 Aug, 10 Sept, and 23 Sept in 2013; berry temperature averaged by each experimental unit and ambient temperature averaged by each time of day.

<sup>b</sup>NO: no leaf removal; MED: post-fruit set removal of leaves to medium extent; HIGH: post-fruit set removal of leaves to high extent; P-B: pre-bloom leaf removal of six basal leaves and laterals.

<sup>c</sup>Data collected on 8 July, 21 July, 5 Aug, 19 Aug, 27 Aug, 8 Sept, 23 Sept, and 7 Oct in 2014; berry and ambient temperature averaged by each experimental unit.

**Supplemental Data for:**

Hickey CC, Kwasniewski MT and Wolf TK. 2018.

Leaf removal effects on Cabernet franc and Petit Verdot: II. Grape carotenoids, phenolics, and wine sensory analysis.

Am J Enol Vitic 69:231-246. doi: 10.5344/ajev.2018.17107.

**Supplemental Table 6** Effect of post-fruit set leaf removal treatment on Cabernet franc and Petit Verdot grape carotenoids in 2012.

| Treatment <sup>a</sup>          | Cabernet franc                                  |                                         |                        |                            |                             |
|---------------------------------|-------------------------------------------------|-----------------------------------------|------------------------|----------------------------|-----------------------------|
|                                 | Lutein 5,6-epoxide<br>(µg/g berry) <sup>b</sup> | Zeaxanthin<br>(µg/g berry) <sup>b</sup> | Lutein<br>(µg/g berry) | β-carotene<br>(µg/g berry) | Zeaxanthin:<br>Lutein ratio |
| NO                              | 0.014                                           | 0.020 b <sup>c</sup>                    | 1.35                   | 1.23                       | 0.012 c                     |
| MED                             | 0.014                                           | 0.021 b                                 | 1.20                   | 1.06                       | 0.014 b                     |
| HIGH                            | 0.014                                           | 0.028 a                                 | 1.33                   | 0.99                       | 0.017 a                     |
| <b>NPS</b>                      |                                                 |                                         |                        |                            |                             |
| Post-fruit set                  | 0.017 a                                         | 0.027 a                                 | 2.02 a                 | 1.99 a                     | 0.013 b                     |
| Preveraison                     | 0.016 a                                         | 0.018 b                                 | 1.76 b                 | 1.35 b                     | 0.010 c                     |
| Veraison                        | 0.010 b                                         | 0.024 a                                 | 1.22 c                 | 0.77 c                     | 0.020 a                     |
| Harvest                         | nd                                              | nd                                      | 0.18 d                 | 0.27 d                     | n/a <sup>d</sup>            |
| <b>Significance<sup>e</sup></b> |                                                 |                                         |                        |                            |                             |
| Treatment                       | ns                                              | 0.0010                                  | ns                     | ns                         | <0.0001                     |
| NPS                             | <0.0001                                         | 0.0011                                  | <0.0001                | <0.0001                    | <0.0001                     |
| Treatment*NPS                   | ns                                              | ns                                      | ns                     | ns                         | ns                          |
| Treatment                       | Petit Verdot                                    |                                         |                        |                            |                             |
|                                 | Lutein 5,6-epoxide<br>(µg/g berry)              | Zeaxanthin<br>(µg/g berry)              | Lutein<br>(µg/g berry) | β-carotene<br>(µg/g berry) | Zeaxanthin:<br>Lutein ratio |
| NO                              | 0.019 b                                         | 0.022 b                                 | 3.04                   | 1.72                       | 0.008 b                     |
| MED                             | 0.022 a                                         | 0.034 b                                 | 3.13                   | 1.77                       | 0.011 a                     |
| HIGH                            | 0.020 ab                                        | 0.035 a                                 | 2.93                   | 1.71                       | 0.012 a                     |
| <b>NPS</b>                      |                                                 |                                         |                        |                            |                             |
| Post-fruit set                  | 0.022                                           | 0.042 a                                 | 3.93 a                 | 2.49 a                     | 0.011 b                     |
| Preveraison                     | 0.020                                           | 0.028 b                                 | 3.52 a                 | 1.67 b                     | 0.008 c                     |
| Veraison                        | 0.020                                           | 0.037 a                                 | 3.54 a                 | 2.00 ab                    | 0.011 b                     |
| Harvest                         | nd                                              | 0.014 c                                 | 1.14 b                 | 0.76 c                     | 0.013 a                     |
| <b>Significance</b>             |                                                 |                                         |                        |                            |                             |
| Treatment                       | 0.0296                                          | <0.0001                                 | ns                     | ns                         | <0.0001                     |
| NPS                             | ns                                              | <0.0001                                 | <0.0001                | <0.0001                    | <0.0001                     |
| Treatment*NPS                   | ns                                              | 0.0013                                  | ns                     | ns                         | ns                          |

<sup>a</sup>NO: no leaf removal; MED: post-fruit set removal of leaves to medium extent; HIGH: post-fruit set removal of leaves to high extent; NPS: normalized phenological stage.

<sup>b</sup>Lutein 5,6-epoxide and zeaxanthin were below the detection threshold (nd) in the Harvest sample. When detected, zeaxanthin ranged from 0.0091 to 0.0137 µg/g berry across treatments.

<sup>c</sup>Means in the same treatment group (columns) not sharing the same letter are significantly different at  $p > 0.05$  based on adjusted  $p$ -values using Tukey's honest significant difference.

<sup>d</sup>n/a: Zeaxanthin:lutein ratio unable to be determined, as zeaxanthin not detected at harvest.

<sup>e</sup>Significance of treatment effects ( $p > F$ ; ns: not significant at  $p = 0.05$ ).

**Supplemental Data for:**

Hickey CC, Kwasniewski MT and Wolf TK. 2018.

Leaf removal effects on Cabernet franc and Petit Verdot: II. Grape carotenoids, phenolics, and wine sensory analysis.

Am J Enol Vitic 69:231-246. doi: 10.5344/ajev.2018.17107.

**Supplemental Table 7** Effect of pre-bloom and post-fruit set leaf removal treatment on Cabernet franc and Petit Verdot grape carotenoids in 2013.

| <b>Cabernet franc</b>           |                                                        |                                                |                                |                                    |                                     |
|---------------------------------|--------------------------------------------------------|------------------------------------------------|--------------------------------|------------------------------------|-------------------------------------|
| <b>Treatment<sup>a</sup></b>    | <b>Lutein 5,6-epoxide<br/>(µg/g berry)<sup>b</sup></b> | <b>Zeaxanthin<br/>(µg/g berry)<sup>b</sup></b> | <b>Lutein<br/>(µg/g berry)</b> | <b>β-carotene<br/>(µg/g berry)</b> | <b>Zeaxanthin:<br/>Lutein ratio</b> |
| NO                              | 0.015 b <sup>c</sup>                                   | 0.019 b                                        | 1.21 ab                        | 0.73                               | 0.013 b                             |
| MED                             | 0.014 b                                                | 0.023 b                                        | 1.07 b                         | 0.66                               | 0.015 b                             |
| HIGH                            | 0.018 a                                                | 0.039 a                                        | 1.29 a                         | 0.75                               | 0.025 a                             |
| P-B                             | 0.016 ab                                               | 0.042 a                                        | 1.34 a                         | 0.75                               | 0.025 a                             |
| <b>NPS</b>                      |                                                        |                                                |                                |                                    |                                     |
| Post-fruit set                  | 0.020 a                                                | 0.028 b                                        | 1.57 a                         | 0.76 a                             | 0.018 b                             |
| Preveraison                     | 0.015 b                                                | 0.040 a                                        | 1.56 a                         | 0.88 a                             | 0.025 a                             |
| Veraison                        | 0.012 c                                                | 0.025 b                                        | 1.48 b                         | 0.88 a                             | 0.016 b                             |
| Harvest                         | nd                                                     | nd                                             | 0.30 b                         | 0.37 b                             | n/a <sup>d</sup>                    |
| <b>Significance<sup>e</sup></b> |                                                        |                                                |                                |                                    |                                     |
| Treatment                       | 0.0010                                                 | <0.0001                                        | 0.0040                         | ns                                 | <0.0001                             |
| NPS                             | <0.0001                                                | <0.0001                                        | <0.0001                        | <0.0001                            | <0.0001                             |
| Treatment*NPS                   | ns                                                     | ns                                             | ns                             | ns                                 | ns                                  |
| <b>Petit Verdot</b>             |                                                        |                                                |                                |                                    |                                     |
| <b>Treatment</b>                | <b>Lutein 5,6-epoxide<br/>(µg/g berry)</b>             | <b>Zeaxanthin<br/>(µg/g berry)</b>             | <b>Lutein<br/>(µg/g berry)</b> | <b>β-carotene<br/>(µg/g berry)</b> | <b>Zeaxanthin:<br/>Lutein ratio</b> |
| NO                              | 0.021 ab                                               | 0.015 b                                        | 2.26 b                         | 1.47                               | 0.008 c                             |
| MED                             | 0.021 b                                                | 0.016 b                                        | 2.14 b                         | 1.28                               | 0.009 bc                            |
| HIGH                            | 0.025 a                                                | 0.023 a                                        | 2.72 a                         | 1.55                               | 0.012 a                             |
| P-B                             | 0.023 ab                                               | 0.027 a                                        | 2.90 a                         | 1.47                               | 0.010 ab                            |
| <b>NPS</b>                      |                                                        |                                                |                                |                                    |                                     |
| Post-fruit set                  | 0.026 a                                                | 0.024 a                                        | 3.36 b                         | 1.17 b                             | 0.007 c                             |
| Preveraison                     | 0.023 a                                                | 0.023 a                                        | 3.92 a                         | 3.27 a                             | 0.006 c                             |
| Veraison                        | 0.019 b                                                | 0.020 a                                        | 1.84 c                         | 0.68 c                             | 0.011 b                             |
| Harvest                         | nd                                                     | 0.014 b                                        | 0.89 d                         | 0.64 c                             | 0.016 a                             |
| <b>Significance</b>             |                                                        |                                                |                                |                                    |                                     |
| Treatment                       | 0.0297                                                 | <0.0001                                        | <0.0001                        | ns                                 | <0.0001                             |
| NPS                             | <0.0001                                                | <0.0001                                        | <0.0001                        | <0.0001                            | <0.0001                             |
| Treatment*NPS                   | ns                                                     | ns                                             | 0.0074                         | ns                                 | 0.0333                              |

<sup>a</sup>NO: no leaf removal; MED: post-fruit set removal of leaves to medium extent; HIGH: post-fruit set removal of leaves to high extent; P-B: pre-bloom leaf removal of six basal leaves and laterals; NPS: normalized phenological stage.

<sup>b</sup>Lutein 5,6-epoxide and zeaxanthin were below the detection threshold (nd) in the Harvest sample. When detected, zeaxanthin ranged from 0.0091 to 0.0137 µg/g berry across treatments.

<sup>c</sup>Means in the same treatment group (columns) not sharing the same letter are significantly different at  $p > 0.05$  based on adjusted  $p$ -values using Tukey's honest significant difference.

<sup>d</sup>n/a: Zeaxanthin:lutein ratio unable to be determined, as zeaxanthin not detected at harvest.

<sup>e</sup>Significance of treatment effects ( $p > F$ ; ns: not significant at  $p = 0.05$ ).

## Supplemental Data for:

Hickey CC, Kwasniewski MT and Wolf TK. 2018.

Leaf removal effects on Cabernet franc and Petit Verdot: II. Grape carotenoids, phenolics, and wine sensory analysis.

Am J Enol Vitic 69:231-246. doi: 10.5344/ajev.2018.17107.

**Supplemental Table 8** Pre-bloom and post-fruit set leaf removal treatment effect on Cabernet franc grape carotenoids in 2014.

| Treatment <sup>a</sup>          | Lutein 5,6-epoxide (µg/g berry) <sup>b</sup> | Zeaxanthin (µg/g berry) <sup>b</sup> | Lutein (µg/g berry) | β-carotene (µg/g berry) | Zeaxanthin:Lutein ratio |
|---------------------------------|----------------------------------------------|--------------------------------------|---------------------|-------------------------|-------------------------|
| NO                              | 0.015 c <sup>c</sup>                         | 0.031 c                              | 1.11 b              | 0.91                    | 0.023 c                 |
| MED                             | 0.016 bc                                     | 0.036 c                              | 1.18 ab             | 0.86                    | 0.026 c                 |
| HIGH                            | 0.017 ab                                     | 0.056 b                              | 1.30 ab             | 0.91                    | 0.035 b                 |
| P-B                             | 0.018 a                                      | 0.064 a                              | 1.26 a              | 0.99                    | 0.038 a                 |
| <b>Canopy side<sup>d</sup></b>  |                                              |                                      |                     |                         |                         |
| East                            | 0.014 b                                      | 0.038 b                              | 1.02 b              | 0.65 b                  | 0.030                   |
| West                            | 0.016 a                                      | 0.057 a                              | 1.35 a              | 0.91 a                  | 0.031                   |
| <b>NPS<sup>e</sup></b>          |                                              |                                      |                     |                         |                         |
| Post-fruit set                  | 0.021                                        | 0.046                                | 1.30                | 1.32                    | 0.031                   |
| Preveraison                     | 0.015                                        | 0.060 a                              | 1.61 a              | 1.07 a                  | 0.038 a                 |
| Veraison                        | 0.015                                        | 0.035 b                              | 1.54 a              | 0.66 b                  | 0.023 b                 |
| Harvest                         | nd                                           | nd                                   | 0.41 b              | 0.61 b                  | n/a <sup>f</sup>        |
| <b>Significance<sup>g</sup></b> |                                              |                                      |                     |                         |                         |
| Treatment (Tx)                  | <0.0001                                      | <0.0001                              | 0.0287              | ns                      | <0.0001                 |
| Canopy side (CS)                | <0.0001                                      | <0.0001                              | <0.0001             | <0.0001                 | ns                      |
| NPS                             | ns                                           | <0.0001                              | <0.0001             | <0.0001                 | <0.0001                 |
| Tx*CS                           | ns                                           | ns                                   | ns                  | ns                      | ns                      |
| Tx*NPS                          | ns                                           | 0.0016                               | 0.0262              | 0.0159                  | 0.0412                  |
| CS*NPS                          | 0.0159                                       | 0.0187                               | <0.0001             | <0.0001                 | <0.0001                 |
| Tx*CS*NPS                       | ns                                           | ns                                   | ns                  | ns                      | ns                      |

<sup>a</sup>NO: no leaf removal; MED: post-fruit set removal of leaves to medium extent; HIGH: post-fruit set removal of leaves to high extent; P-B: pre-bloom removal of six basal leaves and laterals; post-fruit set sample was included in the mean, but not in statistical separation analysis.

<sup>b</sup>Lutein 5,6-epoxide and zeaxanthin were below the detection threshold (nd) in the Harvest sample. When detected, zeaxanthin ranged from 0.0091 to 0.0137 µg/g berry across treatments.

<sup>c</sup>Means in the same treatment group (columns) not sharing the same letter are significantly different at  $p > 0.05$  based on adjusted  $p$ -values using Tukey's honest significant difference.

<sup>d</sup>Does not include post-fruit set sample.

<sup>e</sup>NPS: normalized phenological stage. The post-fruit set sample could not be compared with others statistically because the post-fruit set sample was analyzed as a combination of east-west data while the rest were analyzed separately by canopy side.

<sup>f</sup>n/a: Zeaxanthin:lutein ratio unable to be determined, as zeaxanthin not detected at harvest.

<sup>g</sup>Significance of treatment effects ( $p > F$ ; ns: not significant at 0.05 level).



## Supplemental Data for:

Hickey CC, Kwasniewski MT and Wolf TK. 2018.

Leaf removal effects on Cabernet franc and Petit Verdot: II. Grape carotenoids, phenolics, and wine sensory analysis.

Am J Enol Vitic 69:231-246. doi: 10.5344/ajev.2018.17107.

**Supplemental Table 9** Pre-bloom and post-fruit set leaf removal treatment effect on Petit Verdot grape carotenoids in 2014.

| Treatment <sup>a</sup>          | Lutein 5,6-epoxide (µg/g berry) <sup>b</sup> | Zeaxanthin (µg/g berry) <sup>b</sup> | Lutein (µg/g berry) | β-carotene (µg/g berry) | Zeaxanthin:Lutein ratio |
|---------------------------------|----------------------------------------------|--------------------------------------|---------------------|-------------------------|-------------------------|
| NO                              | 0.017 b <sup>c</sup>                         | 0.021 b                              | 2.65 b              | 2.22 b                  | 0.009 b                 |
| MED                             | 0.017 b                                      | 0.028 b                              | 2.60 b              | 2.32 b                  | 0.012 b                 |
| HIGH                            | 0.021 a                                      | 0.048 a                              | 3.11 a              | 2.64 ab                 | 0.016 a                 |
| P-B                             | 0.019 a                                      | 0.053 a                              | 2.85 a              | 2.73 a                  | 0.019 a                 |
| <b>Canopy side<sup>d</sup></b>  |                                              |                                      |                     |                         |                         |
| East                            | 0.019 a                                      | 0.033                                | 2.70                | 2.54                    | 0.013                   |
| West                            | 0.016 b                                      | 0.033                                | 2.57                | 2.57                    | 0.013                   |
| <b>NPS<sup>e</sup></b>          |                                              |                                      |                     |                         |                         |
| Post-fruit set                  | 0.021                                        | 0.051                                | 3.35                | 2.25                    | 0.016                   |
| Preveraison                     | 0.021 a                                      | 0.040 a                              | 3.84 a              | 3.09 a                  | 0.010 b                 |
| Veraison                        | 0.013 b                                      | 0.036 a                              | 2.43 b              | 2.69 a                  | 0.014 a                 |
| Harvest                         | nd                                           | 0.024 b                              | 1.64 c              | 1.89 b                  | 0.015 a                 |
| <b>Significance<sup>f</sup></b> |                                              |                                      |                     |                         |                         |
| Treatment (Tx)                  | <0.0001                                      | <0.0001                              | 0.0002              | 0.0005                  | <0.0001                 |
| Canopy side (CS)                | <0.0001                                      | ns                                   | ns                  | ns                      | ns                      |
| NPS                             | <0.0001                                      | <0.0001                              | <0.0001             | <0.0001                 | <0.0001                 |
| Tx*CS                           | ns                                           | ns                                   | ns                  | ns                      | ns                      |
| Tx*NPS                          | 0.0002                                       | <0.0001                              | <0.0001             | 0.0016                  | 0.0002                  |
| CS*NPS                          | ns                                           | ns                                   | ns                  | ns                      | ns                      |
| Tx*CS*NPS                       | ns                                           | ns                                   | ns                  | ns                      | ns                      |

<sup>a</sup>NO: no leaf removal; MED: post-fruit set removal of leaves to medium extent; HIGH: post-fruit set removal of leaves to high extent; P-B: pre-bloom removal of six basal leaves and laterals; post-fruit set sample was included in the mean, but not in statistical separation analysis.

<sup>b</sup>Lutein 5,6-epoxide and zeaxanthin were below the detection threshold (nd) in the Harvest sample. When detected, zeaxanthin ranged 0.0091 to 0.0137 µg/g berry across treatments.

<sup>c</sup>Means in the same treatment group (columns) not sharing the same letter are significantly different at  $p > 0.05$  based on adjusted  $p$ -values using Tukey's honest significant difference.

<sup>d</sup>Does not include post-fruit set sample.

<sup>e</sup>NPS: normalized phenological stage. The post-fruit set sample could not be compared with others statistically because the post-fruit set sample was analyzed as a combination of east-west data while the rest were analyzed separately by canopy side.

<sup>f</sup>Significance of treatment effects ( $p > F$ ; ns: not significant at 0.05 level).

**Supplemental Data for:**

Hickey CC, Kwasniewski MT and Wolf TK. 2018.

Leaf removal effects on Cabernet franc and Petit Verdot: II. Grape carotenoids, phenolics, and wine sensory analysis.

Am J Enol Vitic 69:231-246. doi: 10.5344/ajev.2018.17107.

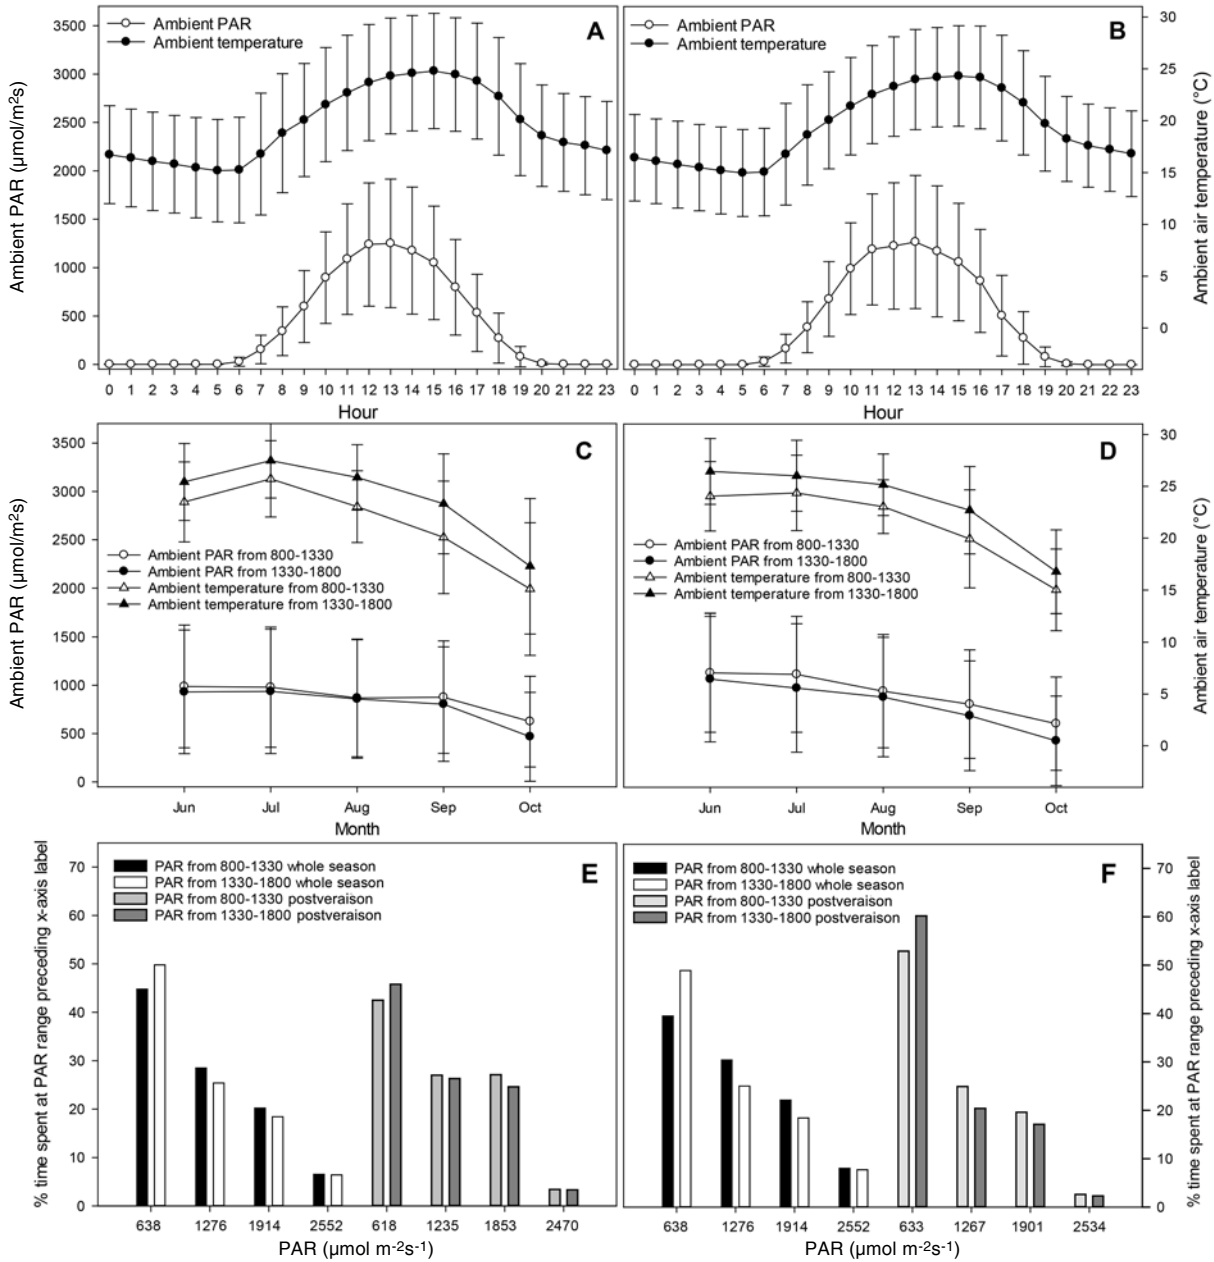

**Supplemental Figure 1** Hourly average ambient photosynthetic active radiation (PAR) and air temperature (A, B), monthly average ambient PAR and air temperature during 800 to 1330 hr and 1330 to 1800 hr (C, D), and percent time spent at 25% increments of the seasonal (1 June to 28 Oct) and postveraison (15 Aug to 9/19 Oct 2013/2014) PAR ranges during 800 to 1330 hr and 1300 to 1800 hr (E, F) in 2013 (A, C, E) and 2014 (B, D, F). Data logged every minute from 1 June to 28 Oct.

**Supplemental Data for:**

Hickey CC, Kwasniewski MT and Wolf TK. 2018.

Leaf removal effects on Cabernet franc and Petit Verdot: II. Grape carotenoids, phenolics, and wine sensory analysis.

Am J Enol Vitic 69:231-246. doi: 10.5344/ajev.2018.17107.

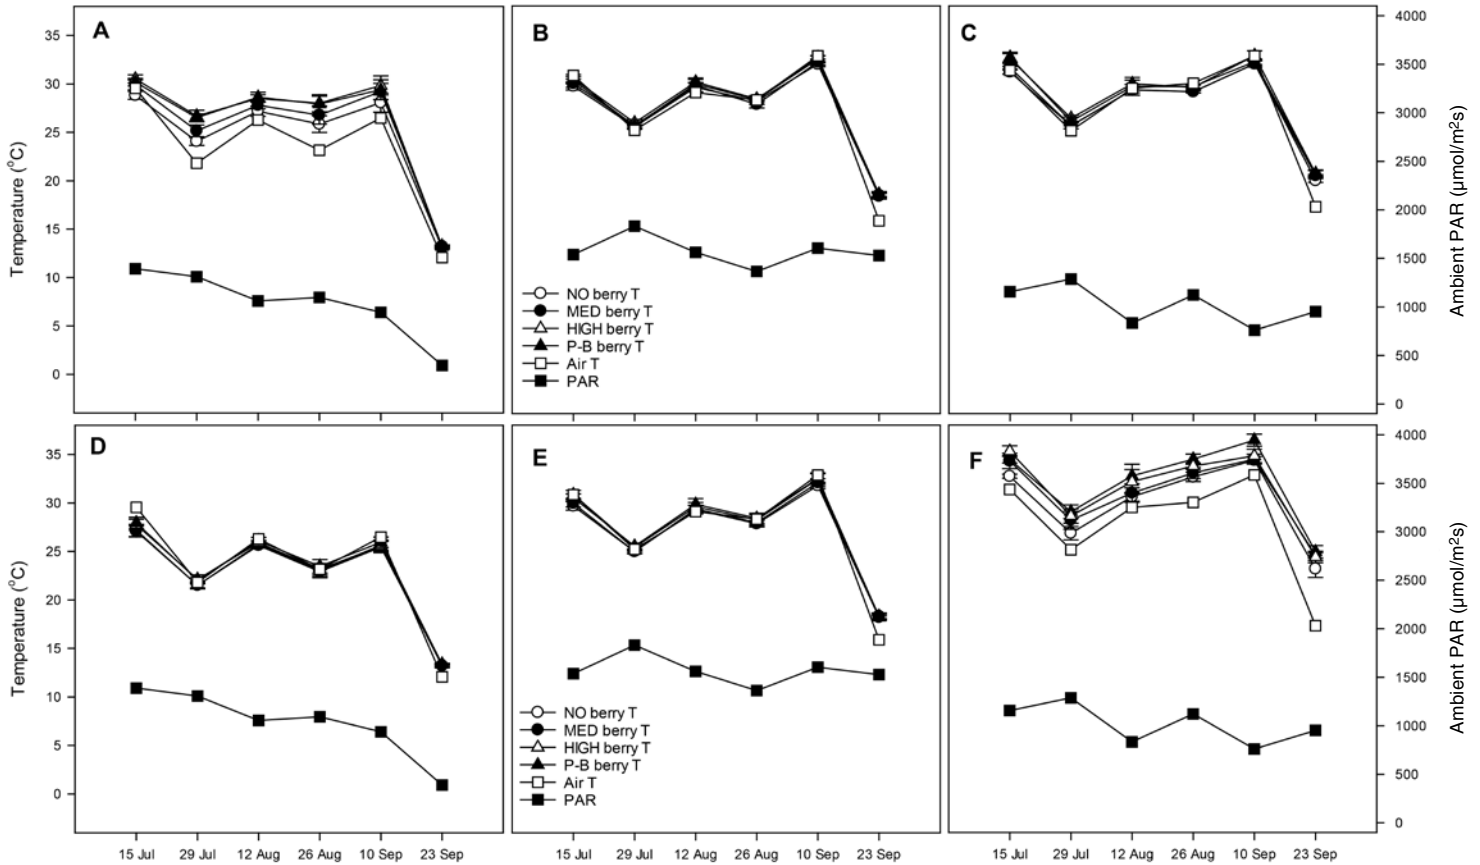

**Supplemental Figure 2** 2013 Cabernet franc berry temperature on EAST (A, B, and C) and WEST (D, E, and F) canopy sides in AM (A and D), NOON (B and E), and PM (C and F) as affected by leaf/lateral removal (NO = no removal; MED and HIGH = post-fruit set removal to medium and high extents, respectively; P-B = pre-bloom removal). AM = 0900 to 1030 hr; NOON = 1245 to 1415 hr; PM = 1545 to 1715 hr. Data points are an average of six berry temperature measurements; n = 6. Error bars are +/- standard error.

**Supplemental Data for:**

Hickey CC, Kwasniewski MT and Wolf TK. 2018.

Leaf removal effects on Cabernet franc and Petit Verdot: II. Grape carotenoids, phenolics, and wine sensory analysis.

Am J Enol Vitic 69:231-246. doi: 10.5344/ajev.2018.17107.

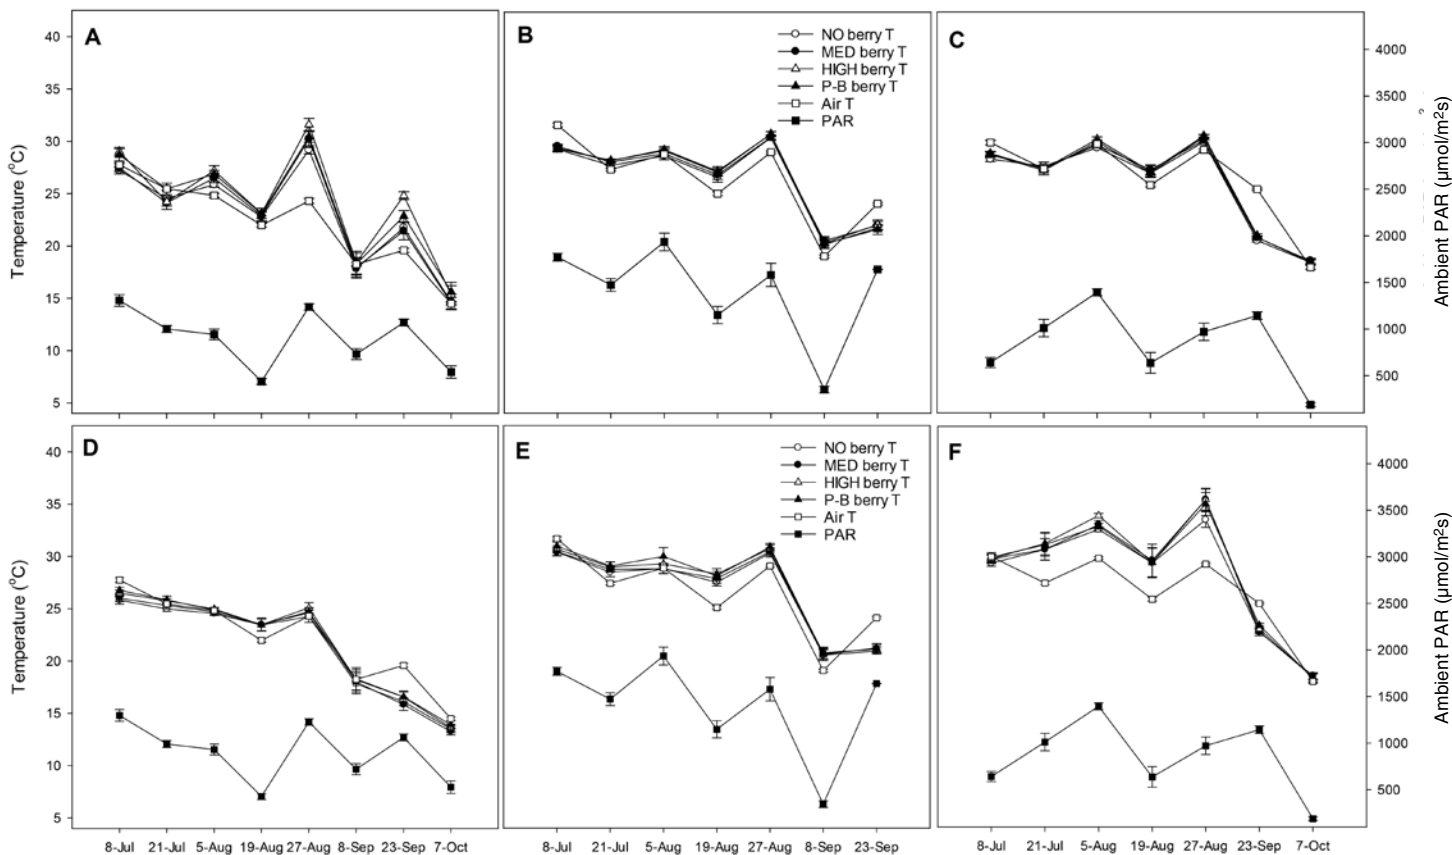

**Supplemental Figure 3** 2014 Cabernet franc berry temperature on EAST (A, B, and C) and WEST (D, E, and F) canopy sides in AM (A and D), NOON (B and E), and PM (C and F) as affected by leaf/lateral removal (NO = no removal; MED and HIGH = post-fruit set removal to medium and high extents, respectively; P-B = pre-bloom leaf removal). AM = 0900 to 1030 hr; NOON = 1245 to 1415 hr; PM = 1545 to 1715 hr. Data points are an average of six berry temperature measurements; n = 6. Error bars are +/- standard error.

**Supplemental Data for:**

Hickey CC, Kwasniewski MT and Wolf TK. 2018.

Leaf removal effects on Cabernet franc and Petit Verdot: II. Grape carotenoids, phenolics, and wine sensory analysis.

Am J Enol Vitic 69:231-246. doi: 10.5344/ajev.2018.17107.

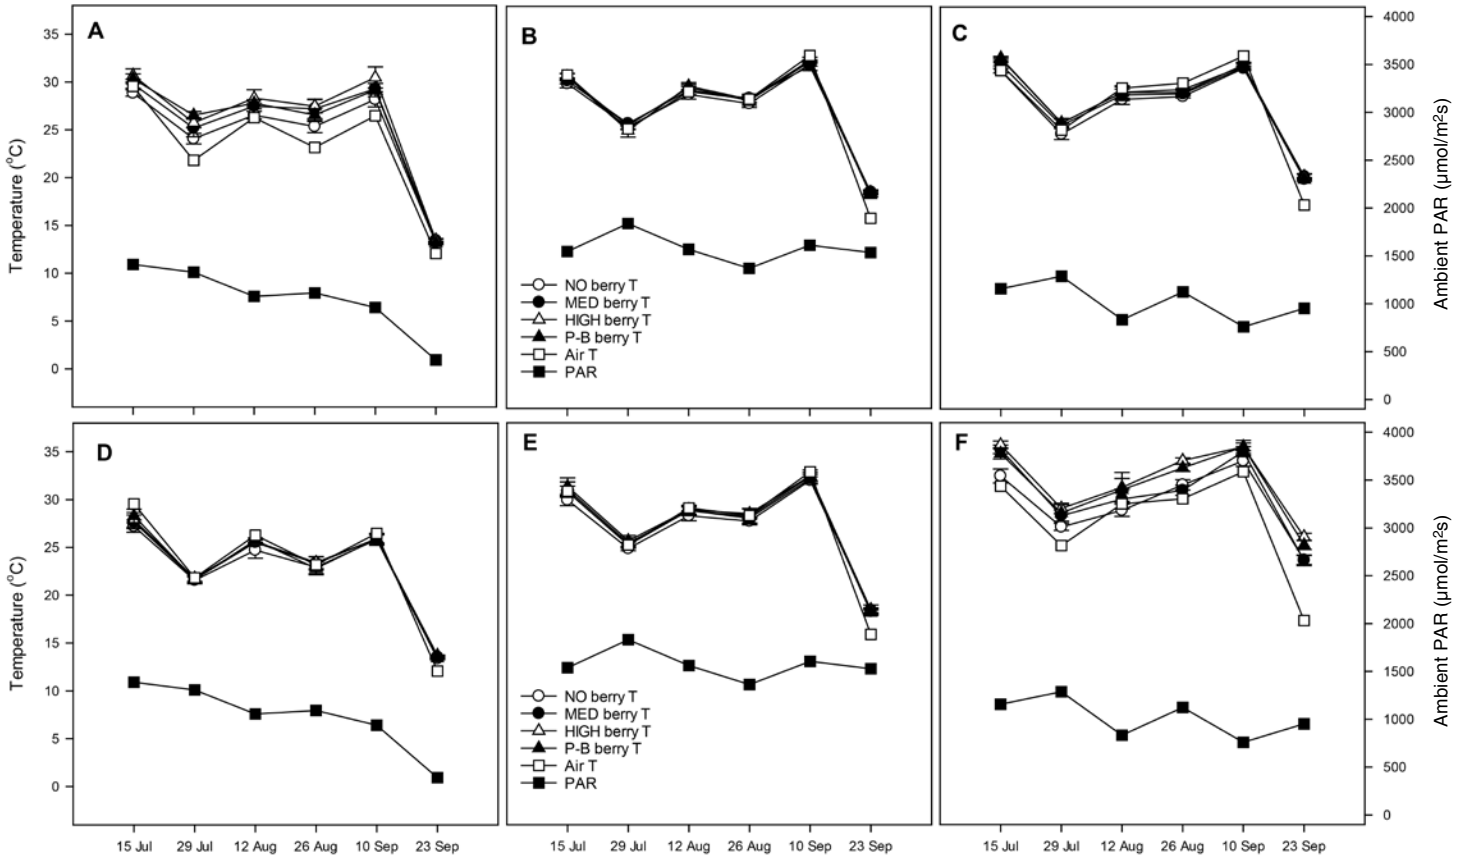

**Supplemental Figure 4** 2013 Petit Verdot berry temperature on EAST (A, B, and C) and WEST (D, E, and F) canopy sides in AM (A and D), NOON (B and E), and PM (C and F) as affected by leaf/lateral removal (NO = no removal; MED and HIGH = post-fruit set removal to medium and high extents, respectively; P-B = pre-bloom leaf removal). AM = 0900 to 1030 hr; NOON = 1245 to 1415 hr; PM = 1545 to 1715 hr. Data points are an average of six berry temperature measurements; n = 6. Error bars are +/- standard error.

**Supplemental Data for:**

Hickey CC, Kwasniewski MT and Wolf TK. 2018.

Leaf removal effects on Cabernet franc and Petit Verdot: II. Grape carotenoids, phenolics, and wine sensory analysis.

Am J Enol Vitic 69:231-246. doi: 10.5344/ajev.2018.17107.

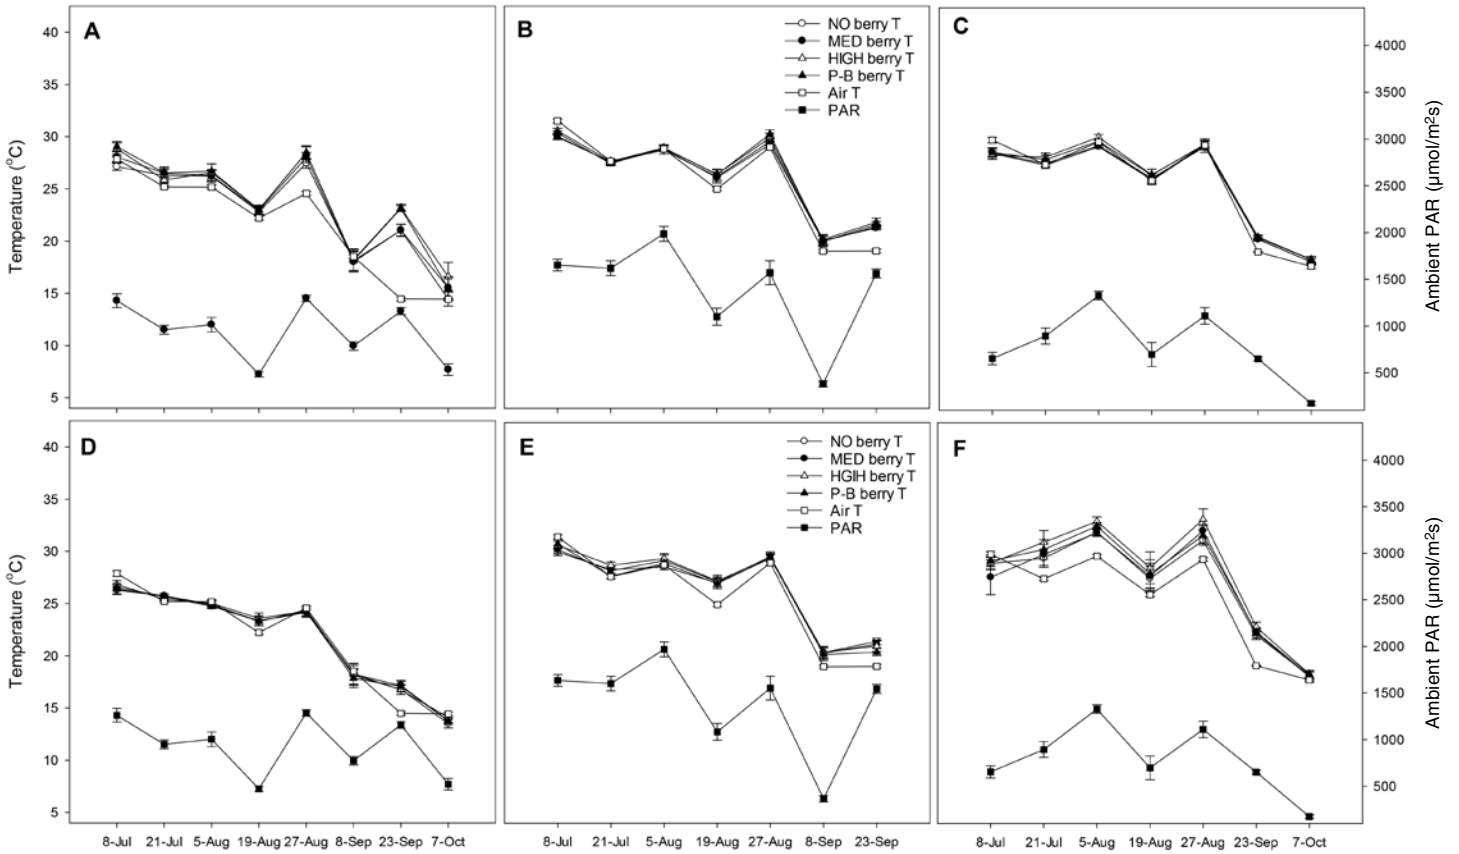

**Supplemental Figure 5** 2014 Petit Verdot berry temperature on EAST (A, B, and C) and WEST (D, E, and F) canopy sides in AM (A and D), NOON (B and E), and PM (C and F) as affected by leaf/lateral removal (NO = no removal; MED and HIGH = post-fruit set removal to medium and high extents, respectively; P-B = pre-bloom removal). AM = 0900 to 1015 hr; NOON = 1245 to 1415 hr; PM = 1545 to 1715 hr. Data points are an average of six berry temperature measurements; n = 6. Error bars are +/- standard error.
